# Supplementary material for: Toxic interactions of different silver forms with freshwater green algae and cyanobacteria and their effects on mechanistic endpoints and the production of extracellular polymeric substances
Source: Royal Society of Chemistry journal article supplement (doi:10.1039/c5en00183h), 2016-01-01
Supplement: c5en00183h1.pdf [file c5en00183h1.pdf]

SUPPLEMENTARY INFORMATION

**Toxic interactions of silver species with freshwater green algae and cyanobacteria and their effects on mechanistic endpoints and the production of extracellular polymeric substances**

Cameron Taylor<sup>1</sup>, Marianne Matzke<sup>2</sup>, Alexandra Kroll<sup>3</sup>, Daniel S. Read<sup>2</sup>, Claus Svendsen<sup>2</sup>, Alison Crossley<sup>1</sup>

<sup>1</sup> Department of Materials, Oxford University Begbroke Science Park, Begbroke Hill, Yarnton, Oxford OX5 1PF, United Kingdom

<sup>2</sup> NERC Centre for Ecology & Hydrology, Maclean Building, Benson Lane, Crowmarsh Gifford, OX10 8BB, United Kingdom

<sup>3</sup> Eawag, Swiss Federal Institute of Aquatic Science and Technology, 8600 Dübendorf, Switzerland

**Table S1.** AG1 in in MBL, CR<sup>-</sup>, SL<sup>-</sup> and CR<sup>+</sup> : TEM data Primary particle ( $d_{pp}$ ) and cluster diameters ( $d_{AGG}$ ), size ranges, aspect ratios of primary particles ( $S_{pp}$ ) and clusters ( $S_{AGG}$ ) and percentage of clusters in tightly bound form visually estimated.

| Media           | Time (h) | Conc. (mg/L) | $d_{pp}$ (nm/no particles) | $d_{pp}$ range (nm) | $S_{pp}$ (range)      | $d_{AGG}$ (nm/no particles) | $d_{AGG}$ range (nm) | $S_{AGG}$ (range)      | %Tightly Bound (no. particles) |
|-----------------|----------|--------------|----------------------------|---------------------|-----------------------|-----------------------------|----------------------|------------------------|--------------------------------|
| MBL             | 0        | 10           | 8.43±3.71/102              | 2.43-23.4           | 1.14±0.26 (1.0-1.46)  | 51.22±26.24/17              | 22.89-96.08          | 1.32±0.252 (1.01-1.69) | 58.8% (17)                     |
|                 | 336      | 10           | 9.62±4.95/110              | 3.45-33.74          | 1.25±0.23 (1.0-2.08)  | 120.45±85.25/17             | 32.35-313.69         | 1.2±0.241 (1.01-1.90)  | 82.35% (17)                    |
| CR <sup>-</sup> | 0        | 10           | 7.77±3.34/106              | 4.94-15.2           | 1.22±0.48 (1.0-2.24)  | 32.11±11.28/40              | 12.32-57.56          | 1.28±0.23 (1.01-2.0)   | 37.5% (40)                     |
|                 | 336      | 10           | 7.81±3.36/104              | 4.81-12.65          | 1.17±0.48 (1.0-2.25)  | 43.6±17.32/37               | 14.22-88.74          | 1.26±0.43 (1.0-3.3)    | 51.35% (37)                    |
| SL <sup>-</sup> | 0        | 10           | 9.45±4.31/102              | 4.49-22.98          | 1.21±0.45 (1.0-1.87)  | 63.31±56.35/31              | 16.8-333.73          | 1.23±0.29 (1.0-2.36)   | 58.07% (31)                    |
|                 | 336      | 10           | 10.4±4.7/92                | 3.48-21.28          | 1.27±0.49 (1.0-2.15)  | 44.72±16.6/36               | 18.38-94.89          | 1.28±0.26 (1.02-2.05)  | 63.89% (36)                    |
| CR <sup>+</sup> | 0        | 10           | 9.17±3.59/107              | 4.64-19.01          | 1.30±0.46 (1.01-2.57) | 48.33±35.96/37              | 17.53-189.37         | 1.21±0.23 (1.01-2.06)  | 48.65% (37)                    |
|                 | 336      | 10           | 7.84±3.48/102              | 4.21-15.19          | 1.15±0.46 (1.0-1.52)  | 48.64±24.45/38              | 14.26-133.61         | 1.12±0.13 (1.0-1.6)    | 76.32% (38)                    |

**Table S2.** Stock solutions used in the creation of MBL Woods Hole media and masses of chemical added to distilled water to create them. Media was prepared by adding 1 mL of each stock solution (1 -11) to 1 L of distilled water (dH<sub>2</sub>O). pH was adjusted to 7.2 with HCl. Media was then autoclaved at 121°C (15 PSI) for 15 minutes.

| Stock Solution | Constituent                                         | Mass of constituent chemical added to 1L distilled water (dH <sub>2</sub> O) (g)                                                                                                      |       |
|----------------|-----------------------------------------------------|---------------------------------------------------------------------------------------------------------------------------------------------------------------------------------------|-------|
| 1              | CaCl <sub>2</sub> .2H <sub>2</sub> O                | 36.76                                                                                                                                                                                 |       |
| 2              | MgSO <sub>4</sub> .7H <sub>2</sub> O                | 36.97                                                                                                                                                                                 |       |
| 3              | NaHCO <sub>3</sub>                                  | 12.60                                                                                                                                                                                 |       |
| 4              | K <sub>2</sub> HPO <sub>4</sub>                     | 8.71                                                                                                                                                                                  |       |
| 5              | NaNO <sub>3</sub>                                   | 85.01                                                                                                                                                                                 |       |
| 6              | Na <sub>2</sub> SiO <sub>3</sub> .9H <sub>2</sub> O | 28.42                                                                                                                                                                                 |       |
| 7              | Na <sub>2</sub> EDTA                                | 4.36                                                                                                                                                                                  |       |
| 8              | FeCl <sub>3</sub> .6H <sub>2</sub> O                | 3.15                                                                                                                                                                                  |       |
| 9              | Metal Mix                                           | Additional instructions: Add each constituent chemical separately to ~750mL of dH <sub>2</sub> O, fully dissolve between each addition. Finally make up to 1L with dH <sub>2</sub> O. |       |
|                | CuSO <sub>4</sub> .5H <sub>2</sub> O                |                                                                                                                                                                                       | 0.01  |
|                | ZnSO <sub>4</sub> .7H <sub>2</sub> O                |                                                                                                                                                                                       | 0.022 |
|                | CoCl <sub>2</sub> .6H <sub>2</sub> O                |                                                                                                                                                                                       | 0.01  |
|                | MnCl <sub>2</sub> .4H <sub>2</sub> O                |                                                                                                                                                                                       | 0.18  |
|                | Na <sub>2</sub> MoO <sub>4</sub> .2H <sub>2</sub> O |                                                                                                                                                                                       | 0.006 |
| 10             | H <sub>3</sub> BO <sub>3</sub>                      | 28.4                                                                                                                                                                                  |       |
| 11             | Tris stock                                          | 250.0                                                                                                                                                                                 |       |

**Table S3.** Nominal and Corrected EC<sub>20</sub>, <sub>50</sub>, <sub>70</sub> values for each toxicant exposed to both species estimated from log-logistic equation fitted to dose-response data sets comprised of independent grown inhibition ecotoxicology experiments. Corrected EC<sub>x</sub> values converted using correction factor derived from difference between nominal and total measured silver values in analytics experiments. EC<sub>x</sub> values given as nominal dose or corrected dose ± 1 standard error. CF is the identifier of correction factor (Table S7) used to convert nominal values.

N= number of experiments used to create curve, n=total number of data points used to create curve, R=replicates within each experiment. *C. reinhardtii* AG1: N=7, n=111, R=2. AG2: N=4, n=64, R=2, AgNO<sub>3</sub>: N=6, n=48, R=2. *S. leopoliensis* AG1: N=6, n=94, R=2. AG2: N=6, n=93, R=2. AgNO<sub>3</sub>: N=3, n=43, R=2

| <i>C. reinhardtii</i>  |            |    |            |            |    |             |                          |    |               |
|------------------------|------------|----|------------|------------|----|-------------|--------------------------|----|---------------|
| ECx                    | AG1 [µg/L] |    |            | AG2 [µg/L] |    |             | AgNO <sub>3</sub> [µg/L] |    |               |
|                        | Initial    | CF | Corrected  | Initial    | CF | Corrected   | Initial                  | CF | Corrected     |
| 20                     | 970 ± 23.4 | 4  | 36.6 ± 0.9 | 1624 ± 180 | 5  | 27.7 ± 3.1  | 24 ± 5.8                 | 2  | 25 ± 6        |
| 50                     | 993 ± 7    | 4  | 37.5 ± 0.3 | 1819 ± 62  | 5  | 31.1 ± 1.1  | 43 ± 7.7                 | 2  | 44.6 ± 8      |
| 70                     | 1008 ± 7   | 4  | 38.1 ± 0.3 | 1950 ± 117 | 5  | 33.3 ± 2    | 63 ± 13                  | 2  | 65.4 ± 13.5   |
| <i>S. leopoliensis</i> |            |    |            |            |    |             |                          |    |               |
| ECx                    |            |    |            |            |    |             |                          |    |               |
| 20                     | 95 ± 23.3  | 8  | 16.1 ± 4   | 33 ± 19    | 10 | 1.8 ± 1.1   | 9.3 ± 5                  | 6  | 11 ± 6        |
| 50                     | 164 ± 27   | 8  | 27.8 ± 4.6 | 184 ± 59.8 | 10 | 10.2 ± 3.3  | 66.9 ± 65                | 7  | 38.2 ± 37.1   |
| 70                     | 228 ± 53   | 9  | 17.9 ± 4.2 | 531 ± 267  | 11 | 27.9 ± 14.1 | 223 ± 342                | 7  | 127.4 ± 195.4 |

**Table S4.** Nominal concentrations, measured and dissolved silver levels from analytical measurements at 0 h and 72 h for plain media and AgNO<sub>3</sub>, AG1 and AG2 *C. reinhardtii* exposures

| <i>C. reinhardtii</i>        |                       |                       |       |                                 |      |
|------------------------------|-----------------------|-----------------------|-------|---------------------------------|------|
| Silver concentrations (µg/L) |                       |                       |       |                                 |      |
| Toxicant                     | Nominal Concentration | Measured Total Silver |       | Measured Total Dissolved Silver |      |
|                              |                       | 0 h                   | 72 h  | 0 h                             | 72 h |
| Plain media                  | n/a                   | 0.065                 | n/a   | n/a                             | n/a  |
|                              | n/a                   | 0.102                 | n/a   | n/a                             | n/a  |
| AgNO <sub>3</sub>            | 1                     | 1.80                  | 1.18  | 1.47                            | 0.15 |
|                              | 1                     | 1.79                  | 1.69  | 1.63                            | 0.10 |
|                              | 10                    | 9.92                  | 5.93  | 10.59                           | 0.25 |
|                              | 10                    | 11.02                 | 6.52  | 10.99                           | 0.27 |
|                              | 20                    | 20.60                 | 18.02 | 20.01                           | 5.44 |
|                              | 20                    | 20.92                 | 17.14 | 20.72                           | 5.81 |
| AG1                          | 100                   | 7.50                  | 1.50  | 1.21                            | 2.10 |
|                              | 100                   | 7.12                  | 1.98  | 1.79                            | 1.13 |
|                              | 500                   | 24.04                 | 27.09 | 2.22                            | 2.22 |
|                              | 500                   | 23.32                 | 28.21 | 1.60                            | 2.03 |
|                              | 700                   | 27.60                 | 27.88 | 2.54                            | 1.66 |
|                              | 700                   | 25.26                 | 27.92 | 12.36                           | 1.58 |
| AG2                          | 500                   | 15.02                 | 5.52  | 0.37                            | 1.41 |
|                              | 500                   | 28.69                 | 4.61  | 0.16                            | 2.07 |
|                              | 1500                  | 28.84                 | 27.28 | 0.95                            | 1.28 |
|                              | 1500                  | 27.96                 | 23.68 | 0.85                            | 6.25 |
|                              | 1700                  | 28.91                 | 22.20 | 0.77                            | 1.77 |
|                              | 1700                  | 29.14                 | 26.11 | 0.90                            | 4.94 |

**Table S5.** Nominal concentrations, measured and dissolved silver levels from analytical measurements at 0 h and 72 h for AgNO<sub>3</sub>, AG1 and AG2 *S. leopoliensis* exposures

| <i>S. leopoliensis</i> |                        |                              |         |                                 |          |
|------------------------|------------------------|------------------------------|---------|---------------------------------|----------|
|                        |                        | Silver Concentrations (µg/L) |         |                                 |          |
| Toxicant               | Nominal Concentrations | Measured Total Silver        |         | Measured Total Dissolved Silver |          |
|                        |                        | 0 h                          | 72 h    | 0 h                             | 72 h     |
| AgNO <sub>3</sub>      | 2                      | 2.3585                       | 1.4965  | 2.112                           | 0.0875   |
|                        | 2                      | 2.3795                       | 1.3705  | 2.131                           | 0.0665   |
|                        | 20                     | 21.9835                      | 19.314  | 21.6915                         | 3.4515   |
|                        | 20                     | 22.636                       | 20.246  | 22.303                          | 5.025    |
|                        | 50                     | 28.3305                      | 26.9265 | 28.2285                         | 16.583   |
|                        | 50                     | 28.799                       | 27.5395 | 27.2015                         | 16.153   |
| AG1                    | 20                     | 0.514                        | 1.984   | 0.514                           | 0.989625 |
|                        | 20                     | 0.8515                       | 1.669   | 0.8515                          | 0.75126  |
|                        | 100                    | 17.1695                      | 13.239  | 1.915869                        | 1.995141 |
|                        | 100                    | 16.7355                      | 9.1705  | 2.096332                        | 2.057427 |
|                        | 250                    | 19.894                       | 10.202  | 1.639329                        | 1.95861  |
|                        | 250                    | 19.3585                      | 7.789   | 0.940856                        | 1.90564  |
| AG2                    | 250                    | 14.025                       | 4.481   | 1.741068                        | 2.645941 |
|                        | 250                    | 13.653                       | 10.367  | 2.115146                        | -0.16676 |
|                        | 500                    | 26.877                       | 15.43   | 1.202053                        | 3.476291 |
|                        | 500                    | 25.819                       | 16.3285 | 2.14638                         | 2.64101  |
|                        | 1100                   | 26.1775                      | 20.612  | 2.958099                        | 2.500913 |
|                        | 1100                   | 25.941                       | 17.4825 | 2.670417                        | 3.645613 |

**Table S6.** Particle size distribution, hydrodynamic/stokes diameter and zeta potential for AG1 and AG2 nanoparticles over a 2 week period using DLS, NTA, DCS and ZP.

| Sample | Media           | Conc. (mg/L) | Technique            |          |            |          |            | ZP range (mV)  | EPM range ( $\mu\text{mcm/Vs}$ ) |
|--------|-----------------|--------------|----------------------|----------|------------|----------|------------|----------------|----------------------------------|
|        |                 |              | DLS                  | NTA      |            | DCS      |            |                |                                  |
|        |                 |              | Z-average $d_H$ (nm) | PSD (nm) | $d_H$ (nm) | PSD (nm) | $d_s$ (nm) |                |                                  |
| AG1    | MBL             | 10           | 145.7-169.2          | ~3-212   | ~30-35     | ~10-90   | ~15-25     | -43 to -38.6   | -2.64 to -0.27                   |
|        | CR <sup>+</sup> | 10           | 185.9-217.1          | ~3-269   | ~56-51     | ~5-297   | ~35        | -11.7 to -12.9 | -1.01 to -0.91                   |
|        | CR <sup>-</sup> | 10           | 117.3-121.6          | ~7-187   | ~32        | ~10-299  | ~30-45     | -15 to -36.1   | -2.83 to -1.19                   |
|        | SL <sup>+</sup> | 10           | 123.7-134.2          | ~7-171   | ~32        | ~10-300  | ~30-40     | -40.8 to -35.5 | -3.20 to -2.70                   |
| AG2    | MBL             | 1            | 68.1-77.1            | 0-60     | ~20        | ~20-100  | ~45        | -24.6 to -21.1 | -2.16 to -1.73                   |
|        | CR <sup>+</sup> | 1            | 76.4-81.5            | 3-205    | ~18-22     | ~14-298  | ~50        | -24.7 to -20.8 | -1.94 to -1.63                   |
|        | CR <sup>-</sup> | 1            | 71.1-77.3            | 3-183    | ~16-19     | ~14-298  | ~50        | -25 to -17     | -1.96 to -1.34                   |
|        | SL <sup>+</sup> | 1            | 69.9-86.3            | 3-238    | ~17-20     | ~10-297  | ~50        | -32 to -26     | -2.51 to -2.04                   |

**Table S7.** AG2 in in MBL, CR<sup>-</sup>, SL<sup>-</sup> and CR<sup>+</sup> : TEM data Primary particle ( $d_{pp}$ ) and cluster diameters ( $d_{AGG}$ ), size ranges, aspect ratios of primary particles ( $S_{pp}$ ) and clusters ( $S_{AGG}$ ) and percentage of clusters in tightly bound form visually estimated.

| Media           | Time (h) | Conc. (mg/L) | $d_{pp}$ (nm/no particles) | $d_{pp}$ range (nm) | $S_{pp}$ (range)             | $d_{AGG}$ (nm/no particles) | $d_{AGG}$ range (nm) | $S_{AGG}$ (range)           | %Tight Bound (no particles) |
|-----------------|----------|--------------|----------------------------|---------------------|------------------------------|-----------------------------|----------------------|-----------------------------|-----------------------------|
| MBL             | 0        | 10           | 43.2 $\pm$ 17.07/55        | 9.56-104.73         | 1.29 $\pm$ 0.21 (1.01-1.87)  | 102.77 $\pm$ 50.49/8        | 56.16-195.39         | 1.64 $\pm$ 0.43 (1.06-2.22) | 0% (8)                      |
|                 | 336      | 10           | 47.0 $\pm$ 17.65/45        | 19.13-86.37         | 1.28 $\pm$ 0.2 (1.0-2.08)    | 71.03 $\pm$ 16.51/5         | 52.13-90.55          | 1.81 $\pm$ 0.52 (1.29-2.58) | 0% (5)                      |
| CR <sup>-</sup> | 0        | 10           | 50.51 $\pm$ 14.5/52        | 21.31-96.15         | 1.18 $\pm$ 0.091 (1.02-1.39) | 99.73 $\pm$ 50.28/12        | 39.29-215.29         | 1.57 $\pm$ 0.55 (1.13-2.84) | 0% (12)                     |
|                 | 336      | 10           | 60.92 $\pm$ 20.82/56       | 26.74-130.08        | 1.19 $\pm$ 0.14 (1.01-1.64)  | 154.08 $\pm$ 98.51/7        | 72.38-365.93         | 1.59 $\pm$ 1.59 (1.08-5.95) | 0% (7)                      |
| SL <sup>-</sup> | 0        | 10           | 56.12 $\pm$ 18.45/51       | 16.99-133.39        | 1.21 $\pm$ 0.13 (1.02-1.7)   | 0/0                         | 0                    | 0 (0)                       | 0% (0)                      |
|                 | 336      | 10           | 75.73 $\pm$ 53.49/39       | 35.08-313.12        | 1.28 $\pm$ 0.24 (1.02-1.98)  | 0/0                         | 0                    | 0 (0)                       | 0% (0)                      |
| CR <sup>+</sup> | 0        | 10           | 54.84 $\pm$ 15.95/54       | 26.52-104.53        | 1.18 $\pm$ 0.13 (1.0-1.48)   | 131.23 $\pm$ 81.88/4        | 73.97-249.35         | 1.82 $\pm$ 0.69 (1.13-2.71) | 0% (4)                      |
|                 | 336      | 10           | 54.29 $\pm$ 13.42/51       | 32.62-109.67        | 1.2 $\pm$ 0.13 (1.02-1.72)   | 91.09 $\pm$ 47.4/7          | 55.1-191             | 1.97 $\pm$ 0.47 (1.2-2.81)  | 0% (7)                      |

**Table S8.** Calculation of EC<sub>x</sub> correction factors. Total silver concentration of the experiment (at 0 h) and correction factor calculated through total measured silver concentrations over nominal concentrations applied. Correction factors are given an identifier to show which correction factor was used to convert nominal concentrations.

| Toxicant                      | Nominal Concentrations (µg/L) | Measured Average Total Silver Concentration (0 h) | Correction Factor (measured / nominal concentration) | Correction Factor Identifier |
|-------------------------------|-------------------------------|---------------------------------------------------|------------------------------------------------------|------------------------------|
| <b><i>C. reinhardtii</i></b>  |                               |                                                   |                                                      |                              |
| <b>AgNO<sub>3</sub></b>       | 10                            | 10.47375                                          | 1.047375                                             | 1                            |
|                               | 20                            | 20.76175                                          | 1.038088                                             | 2                            |
| <b>AG1</b>                    | 100                           | 7.31375                                           | 0.073138                                             | 3                            |
|                               | 700                           | 26.42775                                          | 0.037754                                             | 4                            |
| <b>AG2</b>                    | 1700                          | 29.0245                                           | 0.017073                                             | 5                            |
| <b><i>S. leopoliensis</i></b> |                               |                                                   |                                                      |                              |
| <b>AgNO<sub>3</sub></b>       | 2                             | 2.369                                             | 1.1845                                               | 6                            |
|                               | 50                            | 28.56475                                          | 0.571295                                             | 7                            |
| <b>AG1</b>                    | 100                           | 16.9525                                           | 0.169525                                             | 8                            |
|                               | 250                           | 19.62625                                          | 0.078505                                             | 9                            |
| <b>AG2</b>                    | 250                           | 13.839                                            | 0.055356                                             | 10                           |
|                               | 500                           | 26.348                                            | 0.052696                                             | 11                           |

**Table S9.** Nominal and Corrected concentrations for each toxicant in EPS experiments. Corrected EC<sub>x</sub> values converted using correction factor derived from difference between nominal and total measured silver values in analytics experiments. CF is the identifier of correction factor (Table S7) used to convert nominal values.

| <b><i>C. reinhardtii</i></b>  |    |           |            |    |           |                          |    |           |
|-------------------------------|----|-----------|------------|----|-----------|--------------------------|----|-----------|
| AG1 [µg/L]                    |    |           | AG2 [µg/L] |    |           | AgNO <sub>3</sub> [µg/L] |    |           |
| Nominal                       | CF | Corrected | Nominal    | CF | Corrected | Nominal                  | CF | Corrected |
| 50                            | 3  | 3.7       | 1624       | 5  | 27.7      | 5                        | 1  | 5.2       |
| 969                           | 4  | 36.6      | 3500       | 5  | 59.8      | 23                       | 2  | 24.1      |
| <b><i>S. leopoliensis</i></b> |    |           |            |    |           |                          |    |           |
| 300                           | 9  | 23.6      | 600        | 11 | 31.6      | 9.2                      | 6  | 10.9      |

**Table S10.** Total EPS detected as DOC per dry weight [mg/mg] produced by *C. reinhardtii* within 72 h in control cultures or when exposed to nominal concentrations of AG1, AG2, or AgNO<sub>3</sub>. Each line represents one replicate.

|                | <b>AG1</b>     |                 | <b>AG2</b>       |                  | <b>AgNO<sub>3</sub></b> |                |
|----------------|----------------|-----------------|------------------|------------------|-------------------------|----------------|
| <b>Control</b> | <b>50 µg/L</b> | <b>969 µg/L</b> | <b>1624 µg/L</b> | <b>3500 µg/L</b> | <b>5 µg/L</b>           | <b>23 µg/L</b> |
| 0.0503         | 0.0378         | 0.0476          | 0.0189           | 0.0237           | 0.0369                  | 0.0449         |
| 0.0519         | 0.0373         | 0.0275          | 0.0486           | 0.0148           | 0.0402                  | 0.0587         |
| 0.0484         | 0.0391         | 0.0284          | 0.0360           | 0.0178           | 0.0579                  | 0.0313         |

**Table S11.** Percentage of biopolymers of EPS detected as DOC per dry weight [mg/mg] produced by *C. reinhardtii* within 72 h in control cultures or when exposed to nominal concentrations of AG1, AG2, or AgNO<sub>3</sub>.

|                | <b>AG1</b>     |                 | <b>AG2</b>       |                  | <b>AgNO<sub>3</sub></b> |                |
|----------------|----------------|-----------------|------------------|------------------|-------------------------|----------------|
| <b>Control</b> | <b>50 µg/L</b> | <b>969 µg/L</b> | <b>1624 µg/L</b> | <b>3500 µg/L</b> | <b>5 µg/L</b>           | <b>23 µg/L</b> |
| 62.7742        | 65.3284        | 14.3012         | 19.5643          | 11.4372          | 44.3222                 | 16.4550        |
| 66.2854        | 61.2603        | 16.9474         | 23.3519          | 21.3451          | 61.0834                 | 14.4921        |
| 68.3537        | 63.5068        | 15.5916         | 18.8535          | 59.9493          | 19.4811                 | 18.9951        |

**Table S12.** Percentage of building blocks of humic substances of EPS detected as DOC per dry weight [mg/mg] produced by *C. reinhardtii* within 72 h in control cultures or when exposed to nominal concentrations of AG1, AG2, or AgNO<sub>3</sub>.

|                | <b>AG1</b>     |                 | <b>AG2</b>       |                  | <b>AgNO<sub>3</sub></b> |                |
|----------------|----------------|-----------------|------------------|------------------|-------------------------|----------------|
| <b>Control</b> | <b>50 µg/L</b> | <b>969 µg/L</b> | <b>1624 µg/L</b> | <b>3500 µg/L</b> | <b>5 µg/L</b>           | <b>23 µg/L</b> |
| 12.9051        | 11.2910        | 18.7251         | 19.9382          | 18.0025          | 9.2403                  | 19.1310        |
| 11.6171        | 11.3852        | 19.7658         | 16.8085          | 17.5492          | 11.1245                 | 20.2411        |
| 10.6347        | 12.1131        | 20.1097         | 18.6824          | 11.6142          | 18.2799                 | 24.5197        |

**Table S13.** Percentage of low molecular weight acids of EPS detected as DOC per dry weight [mg/mg] produced by *C. reinhardtii* within 72 h in control cultures or when exposed to nominal concentrations of AG1, AG2, or AgNO<sub>3</sub>.

|                | <b>AG1</b>     |                 | <b>AG2</b>       |                  | <b>AgNO<sub>3</sub></b> |                |
|----------------|----------------|-----------------|------------------|------------------|-------------------------|----------------|
| <b>Control</b> | <b>50 µg/L</b> | <b>969 µg/L</b> | <b>1624 µg/L</b> | <b>3500 µg/L</b> | <b>5 µg/L</b>           | <b>23 µg/L</b> |
| 14.4672        | 13.8517        | 25.2617         | 25.7078          | 25.1097          | 11.4593                 | 26.5819        |
| 13.1457        | 14.3313        | 26.7416         | 24.2158          | 22.5802          | 14.5322                 | 27.8564        |
| 11.2992        | 14.8051        | 26.8568         | 24.6405          | 14.7896          | 25.9487                 | 29.3520        |

**Table S14.** Percentage of neutral/amphiphilic compounds of EPS detected as DOC per dry weight [mg/mg] produced by *C. reinhardtii* within 72 h in control cultures or when exposed to nominal concentrations AG1, AG2, or AgNO<sub>3</sub>.

| Control | AG1<br>50 µg/L | 969 µg/L | AG2<br>1624 µg/L | 3500 µg/L | AgNO <sub>3</sub><br>5 µg/L | 23 µg/L |
|---------|----------------|----------|------------------|-----------|-----------------------------|---------|
| 9.8535  | 9.5289         | 41.7120  | 34.7898          | 45.4506   | 34.9782                     | 37.8321 |
| 8.9518  | 13.0232        | 36.5451  | 35.6237          | 38.5255   | 13.2600                     | 37.4103 |
| 9.7124  | 9.5750         | 37.4419  | 37.8236          | 13.6470   | 36.2903                     | 27.1331 |

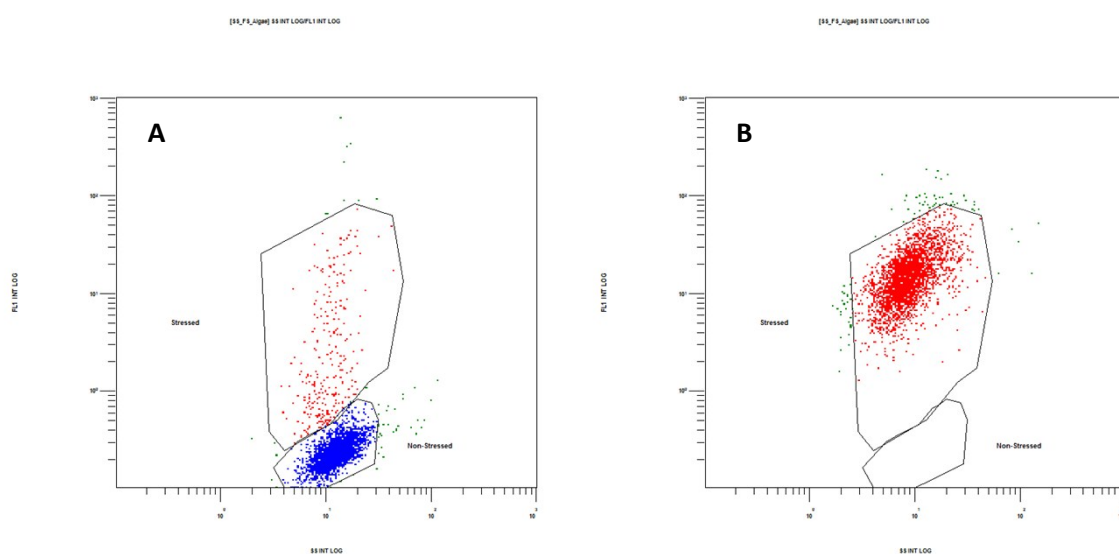

**Figure S1.** Dot plots of FL1 detected auto-fluorescence vs. Side scatter (SS) obtained by flow cytometry showing a control population stained using FDA (A) and the effect of H<sub>2</sub>O<sub>2</sub> on the population (B).



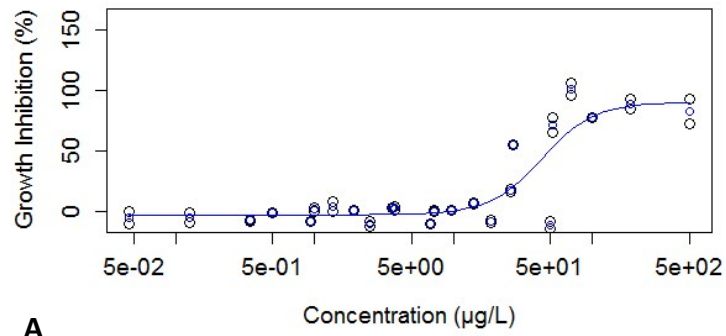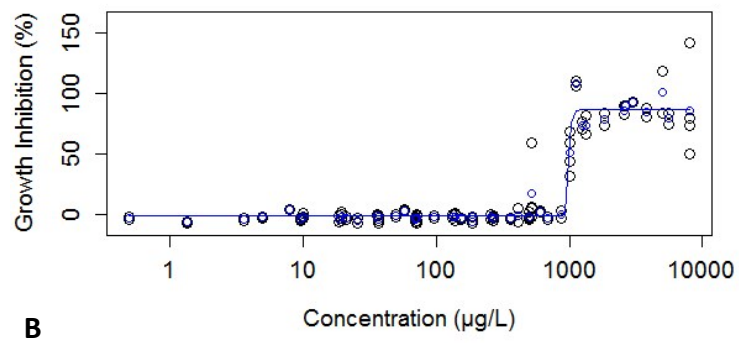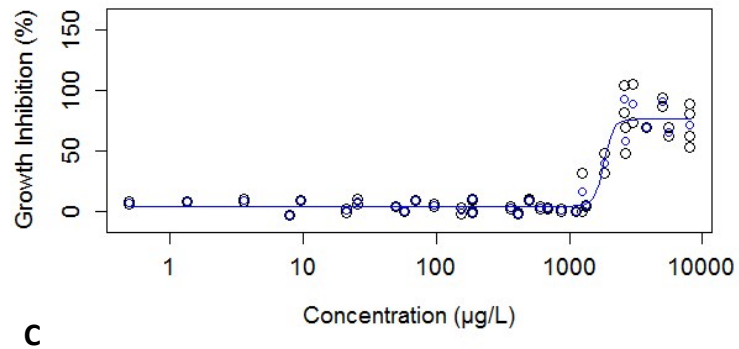

**Figure S2.** *C. reinhardtii* dose-response curves with log-logistic (4 parameter) curve fit A) AgNO<sub>3</sub> B) AG1 C) AG2

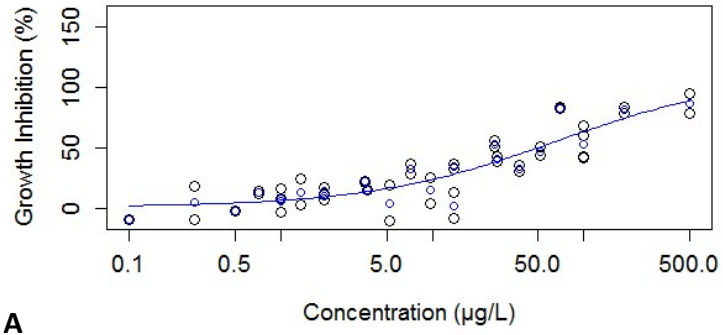

**A**

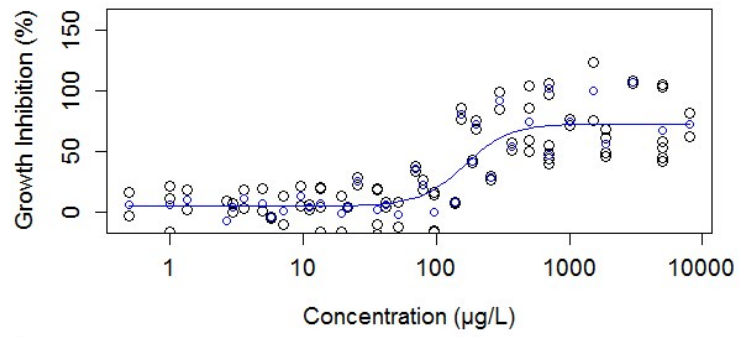

**B**

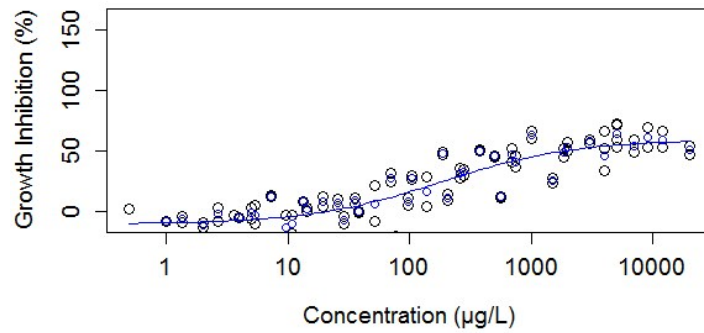

**C**

**Figure S3.** *S. leopoliensis* dose-response curves with log-logistic (4 parameter) curve fit A) AgNO<sub>3</sub> B) AG1 C) AG2

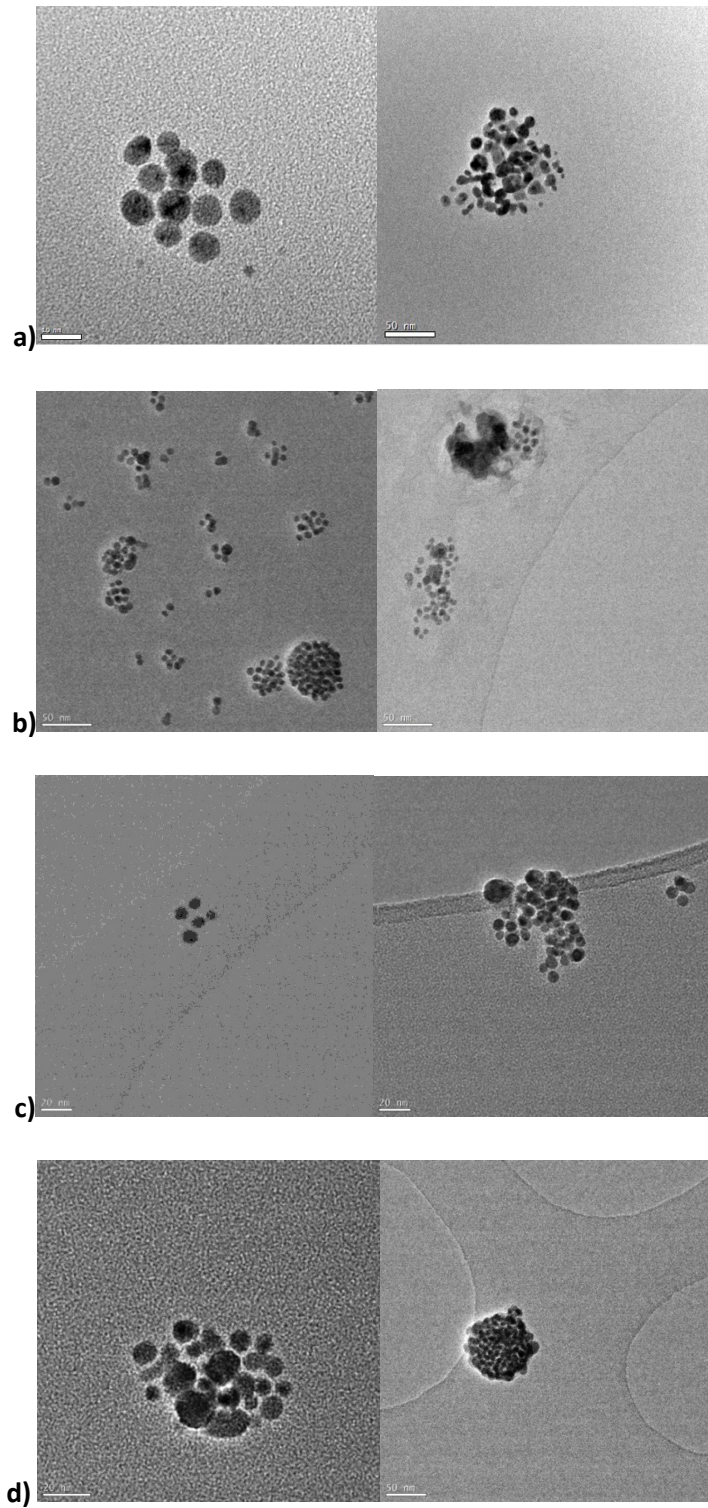

**Figure. S4.** TEM image of 10mg/L AG1 in different media at 0h and 2 weeks – a) MBL medium b) CR<sup>-</sup> c) CR<sup>+</sup> d) SL<sup>-</sup>

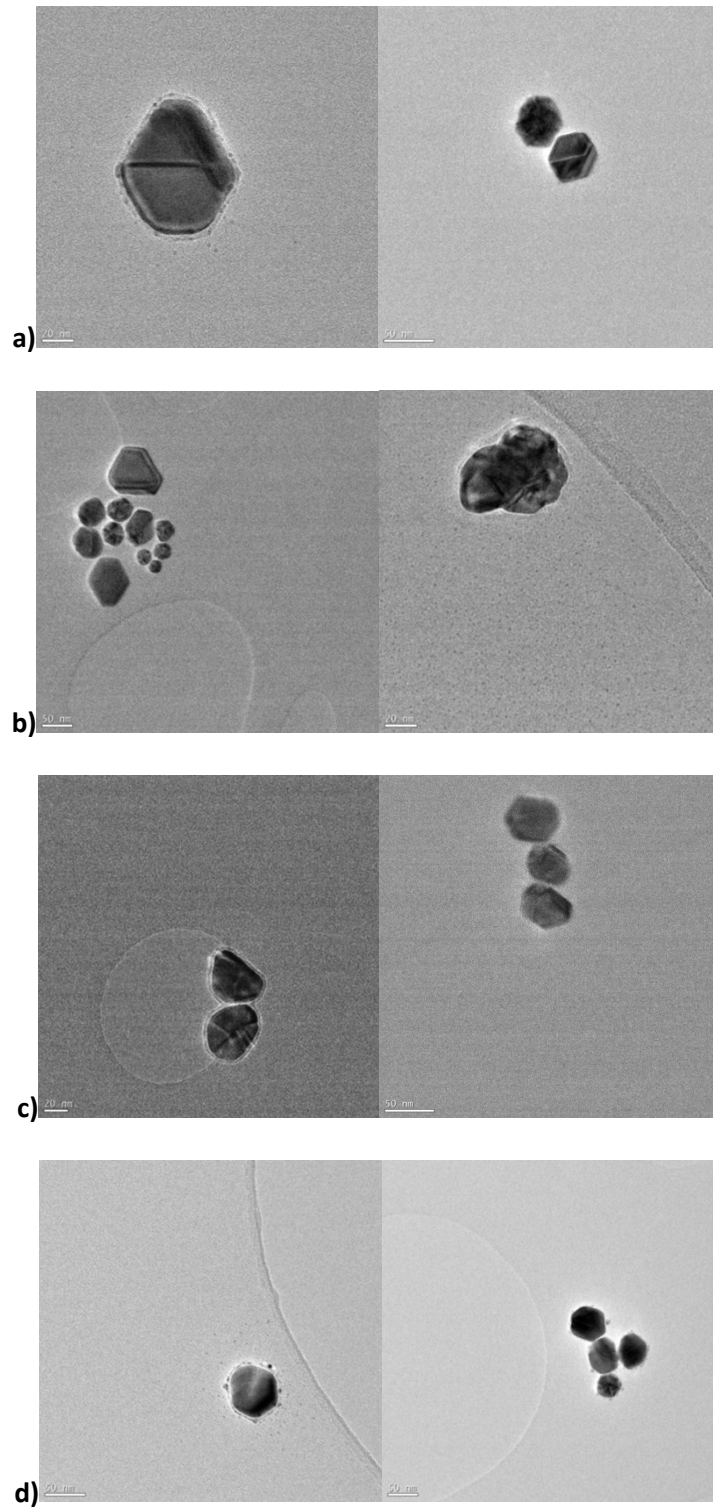

**Figure. S5.** TEM image of 1mg/L AG2 in different media at 0h and 2 weeks – a) MBL medium b) CR<sup>-</sup> c) CR<sup>+</sup> d) SL<sup>-</sup>

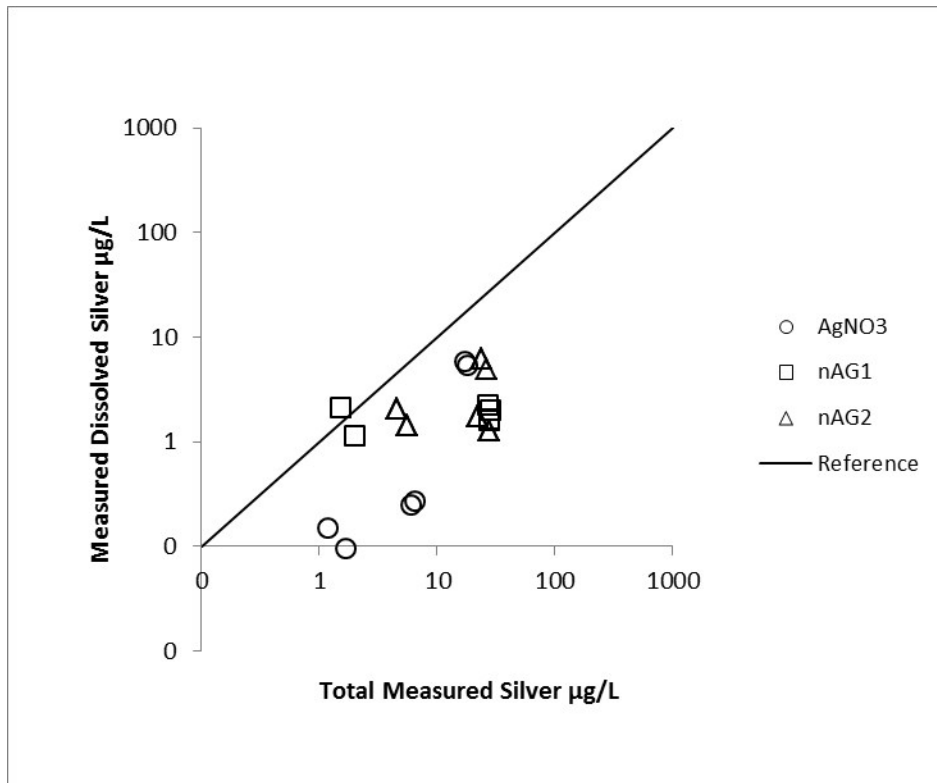

**Figure S6.** Total vs. Dissolved silver for AgNO<sub>3</sub>, AG1 and AG2 *C. reinhardtii* exposures

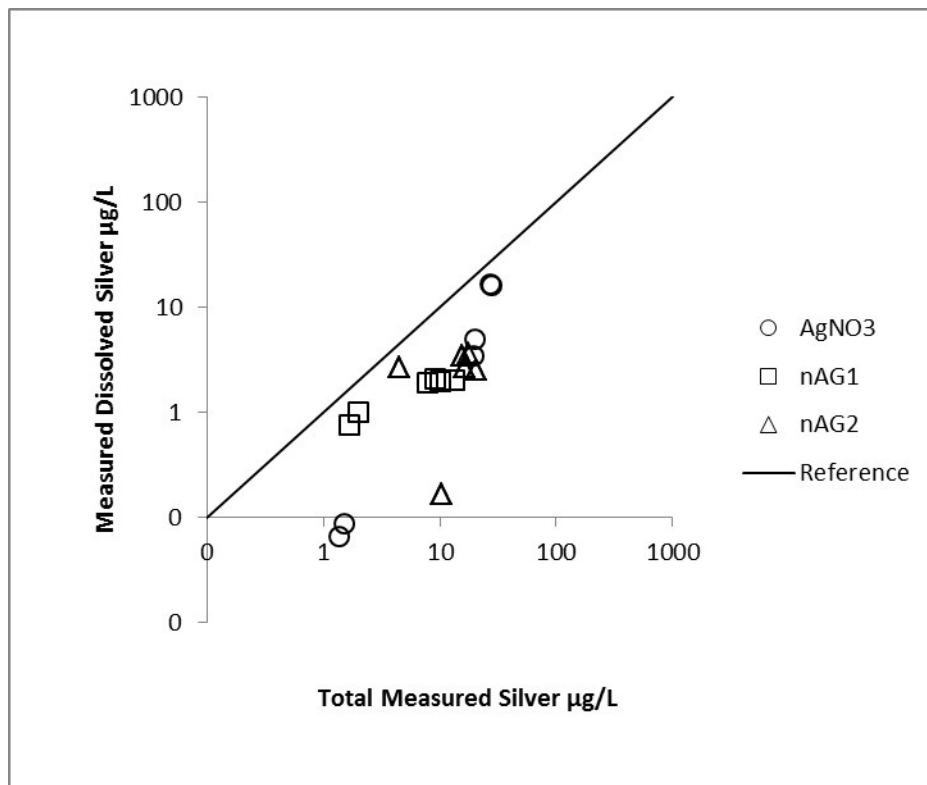

**Figure S7.** Total vs. Dissolved silver for AgNO<sub>3</sub>, AG1 and AG2 *S. leopoliensis* exposures.

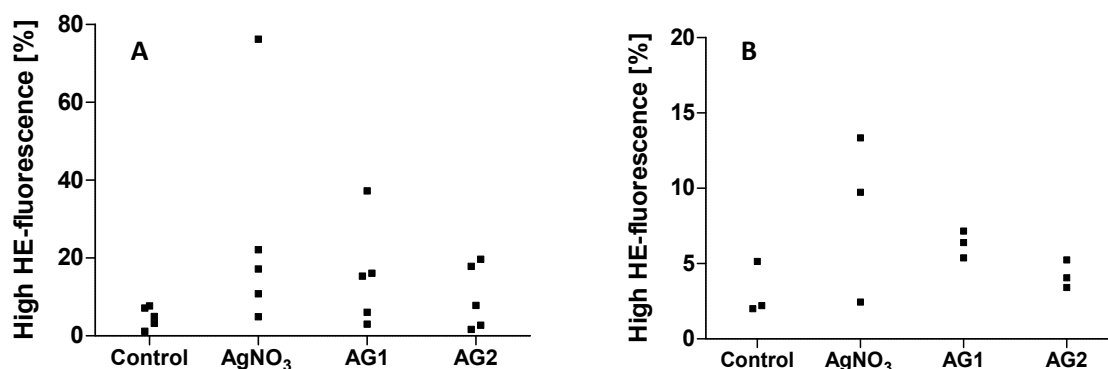

**Figure S8.** Reactive Oxygen Species production: HE Stain. Percentage of high HE fluorescent cells (detection of H<sub>2</sub>O<sub>2</sub>) when exposed to EC<sub>70</sub> of AgNO<sub>3</sub>, AG1 and AG2 in A) *C. reinhardtii* and B) *S. leopoliensis*. Means +/- 1SD for the means of 3 replicates of 5 experiments (*C. reinhardtii*) and 3 experiments (*S. leopoliensis*) respectively. 'a' indicates significant difference compared to the control (p value ≤0.05) derived from fitting a standard linear model to ratios of stressed/unstressed cells. Control value deviates from 0 % because even in healthy cultures some cells fall into the stressed gate.

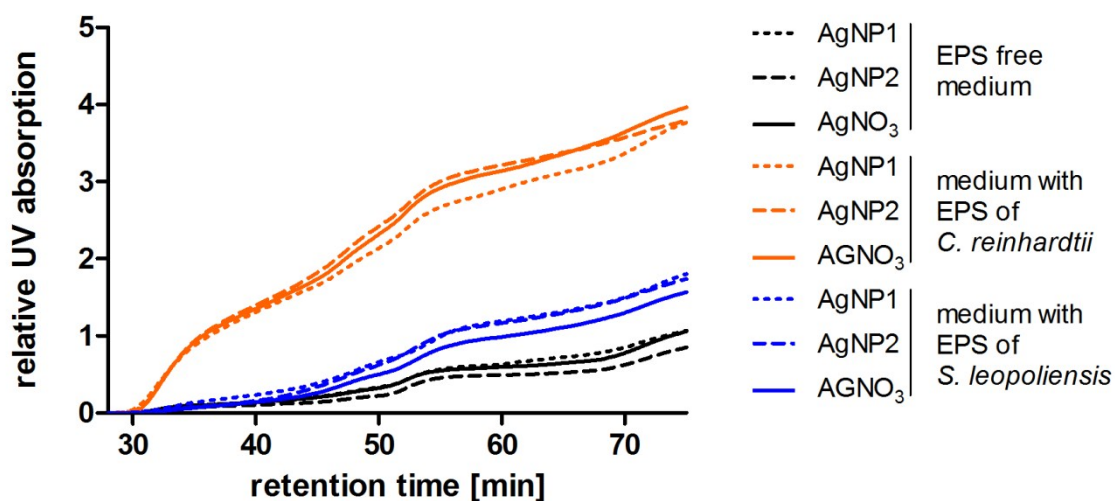

**Figure S9.** Representative UV-signals of DOC in algae growth medium integrated from 28 to 75 min retention time. Algae growth medium contained either no EPS or EPS produced within 72 h of culturing of either *C. reinhardtii* or *S. leopoliensis*. AG1, AG2, or AgNO<sub>3</sub> was diluted in each type of medium to yield the respective nominal concentration of Ag and incubated for 72 h as during the toxicity assays.

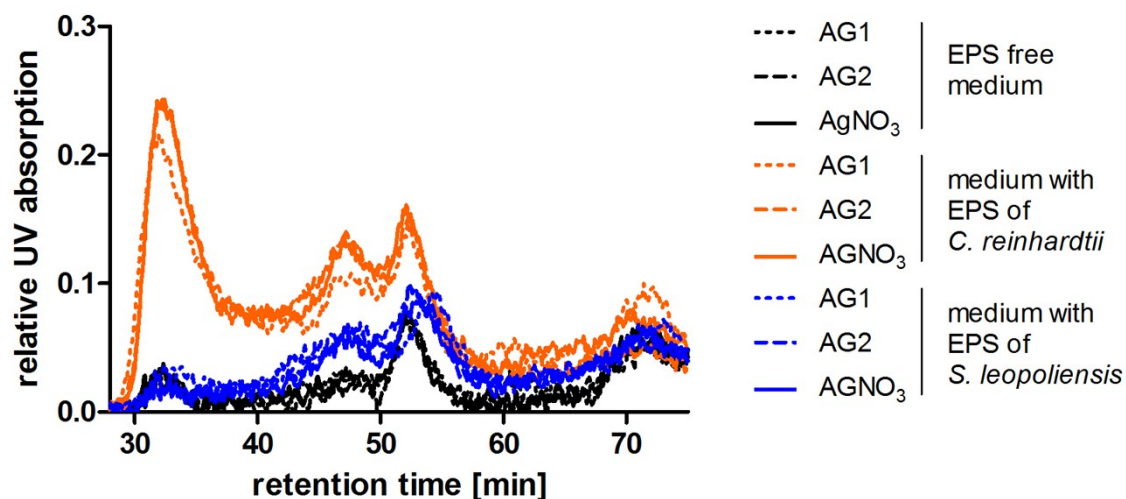

**Figure S10.** Representative UV-signals of DOC in algae growth medium between 28 to 75 min retention time. Algae growth medium contained either no EPS or EPS produced within 72 h of culturing of either *C. reinhardtii* or *S. leopoliensis*. AG1, AG2, or AgNO<sub>3</sub> was diluted in each type of medium to yield the respective EC<sub>70</sub> and incubated for 72 h as during the toxicity assays

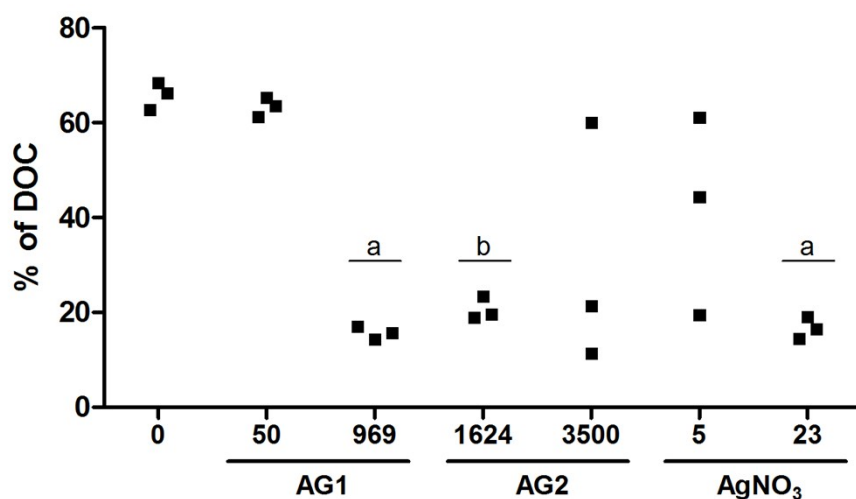

**Figure S11.** Percentage of biopolymers of total EPS detected as DOC per dry weight produced by *C. reinhardtii* within 72 h in control cultures or when exposed to indicated concentrations [ $\mu\text{g/L}$ ] of AG1, AG2, or AgNO<sub>3</sub>. a: \*\*, b: \*, means are significantly different from control, one way ANOVA,  $p=0.0005$ ,  $F=8.505$ , Bonferroni's post-test.

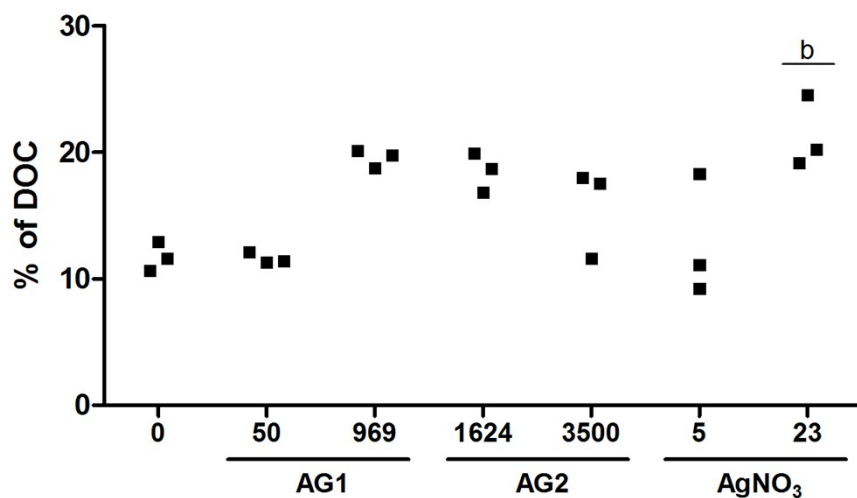

**Figure S12.** Percentage of building blocks of humic substances of total EPS detected as DOC per dry weight produced by *C. reinhardtii* within 72 h in control cultures or when exposed to indicated concentrations [ $\mu\text{g/L}$ ] of AG1, AG2, or  $\text{AgNO}_3$ . b: \*, mean is significantly different from control, one way ANOVA,  $p=0.0015$ ,  $F=6.856$ , Bonferroni's post-test.

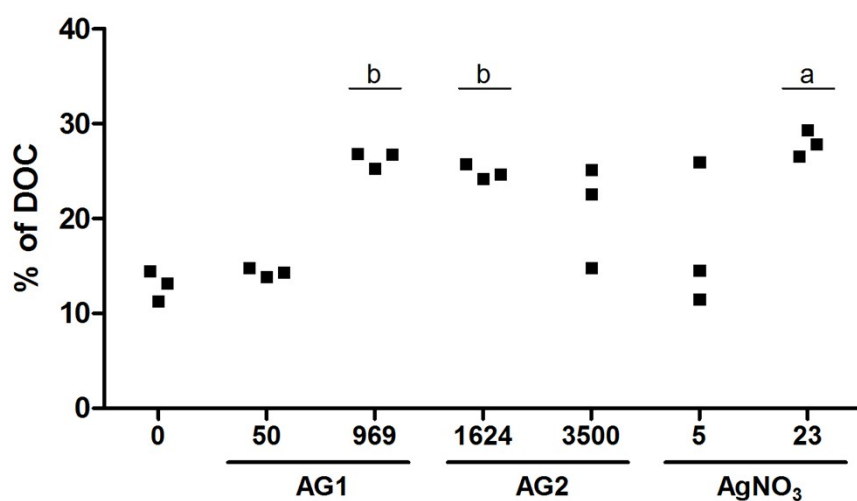

**Figure S13.** Percentage of low molecular weight acids of total EPS detected as DOC per dry weight produced by *C. reinhardtii* within 72 h in control cultures or when exposed to indicated concentrations [ $\mu\text{g/L}$ ] of AG1, AG2, or  $\text{AgNO}_3$ . a: \*\*, b: \*, means are significantly different from control, one way ANOVA,  $p=0.0007$ ,  $F=7.974$ , Bonferroni's post-test.



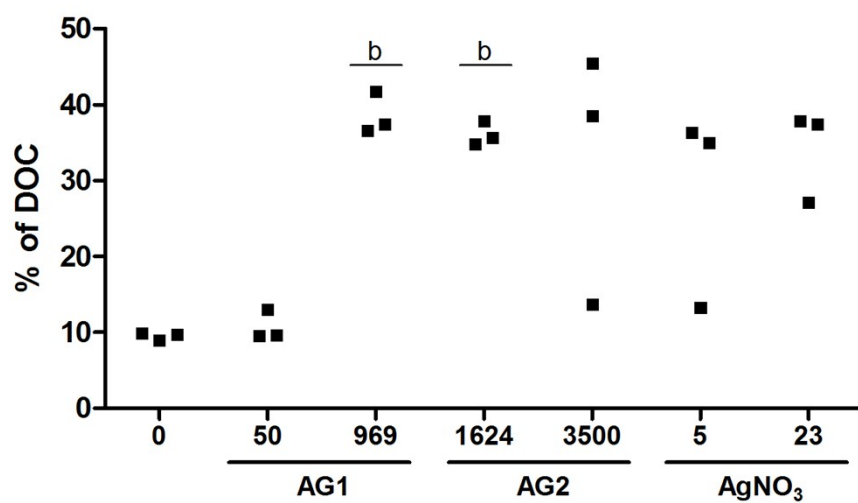

**Figure S14.** Percentage of neutral/amphiphilic compounds of total EPS detected as DOC per dry weight produced by *C. reinhardtii* within 72 h in control cultures or when exposed to indicated concentrations [ $\mu\text{g/L}$ ] of AG1, AG2, or  $\text{AgNO}_3$ . b: \*, means are significantly different from control, one way ANOVA,  $p=0.0025$ ,  $F=6.117$ , Bonferroni's post-test.
